# Supplementary material for: The fabrication and the characterization of a TiO2/titanate nanohybrid for efficient hydrogen evolution
Source: Royal Society of Chemistry journal article supplement (doi:10.1039/c4ra14544e), 2015-01-01
Supplement: c4ra14544e1.pdf [file c4ra14544e1.pdf]

# **The Fabrication and the Characterization of TiO<sub>2</sub>/Titanate Nanohybrid for Efficient Hydrogen Evolution**

Shien Guo, Hongyan Ning, Mingxia Li \*, Rong Hao, Yuting Luan, Baojiang Jiang\*

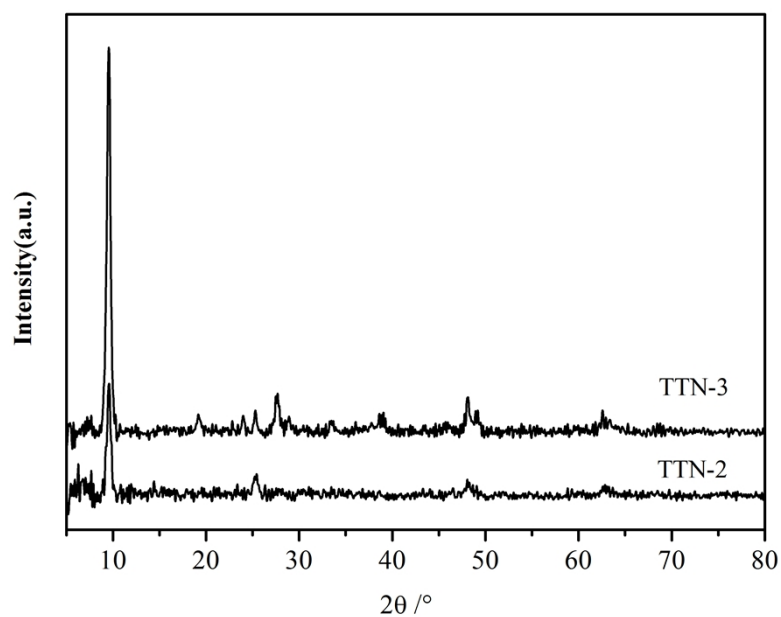

**Figure S1.** X-ray diffraction patterns of different products including TTN-2 and TTN-3

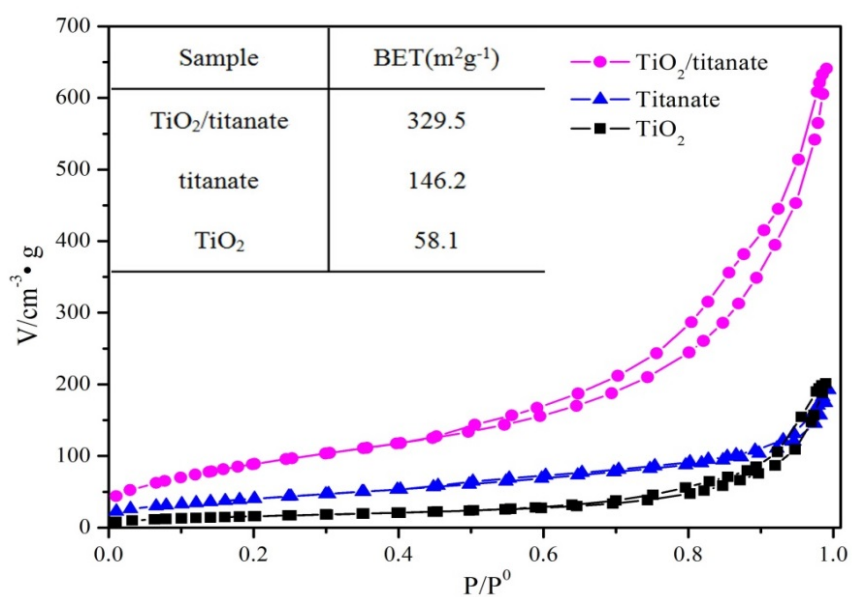

**Figure S2.** The N<sub>2</sub> adsorption-desorption isotherms and the corresponding specific surface area (inset) of TiO<sub>2</sub>/titanate (TTN-1), titanate and TiO<sub>2</sub>.

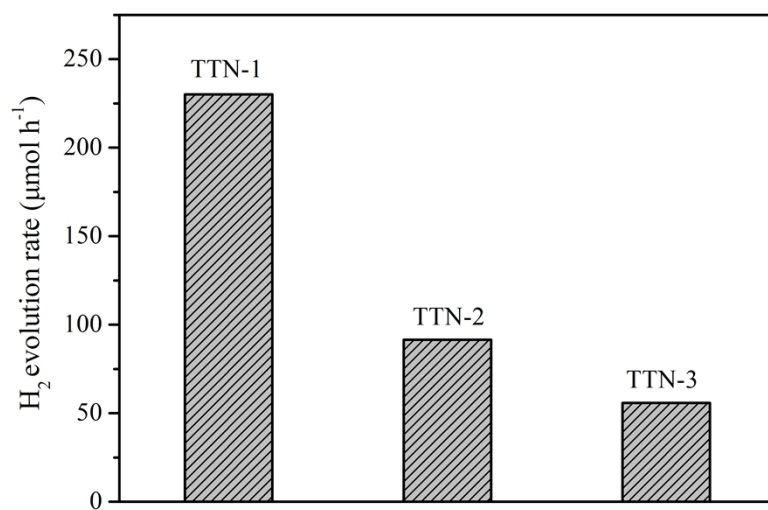

**Figure S3.** Photocatalytic H<sub>2</sub> evolution performance of different products including TTN-1, TTN-2, and TTN-3 under UV light irradiation.
